# Supplementary material
Source: ML conference proceedings conference paper supplement (https://proceedings.neurips.cc/paper_files/paper/2021/hash/473803f0f2ebd77d83ee60daaa61f381-Abstract.html)
Supplement: Supplementary file [file 473803f0f2ebd77d83ee60daaa61f381-Supplemental.pdf]

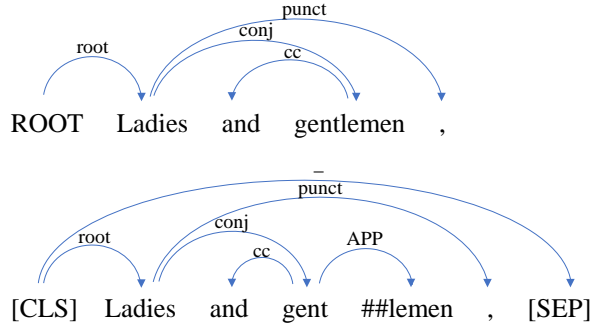

Figure 2: An example of extending a word-level parsing tree to a subword-level.

Table 7: Model parameters and training data where CC denotes CommonCrawl.

|               | UD-BERT              | m-BERT            | UD-XLM-R <sub>base</sub> | XLM-R <sub>base</sub> | UD-XLM-R <sub>large</sub> | XLM-R <sub>large</sub> |
|---------------|----------------------|-------------------|--------------------------|-----------------------|---------------------------|------------------------|
| parameters    | 192.0M               | 177.9M            | 291.8M                   | 278.0M                | 581.1M                    | 559.9M                 |
| training data | UD+Wiki<br>(373.16M) | Wiki<br>(372.10M) | UD+CC<br>(2502.26M)      | CC<br>(2501.20M)      | UD+CC<br>(2502.26M)       | CC<br>(2501.20M)       |

## A Appendix

### A.1 Extending Strategy for Parsing Treebanks

Denote a sentence as  $\hat{X} = [w_1, w_2, \dots, w_N]$  and its corresponding subword-level sentence as  $X = [[\text{CLS}], w_{11}, \dots, w_{1s_1}, w_{21}, \dots, w_{2s_2}, \dots, w_{N1}, \dots, w_{Ns_N}, [\text{SEP}]]$ . In the word-level parsing tree, for  $w_i \in \hat{X}$ , suppose the head of  $w_i$  is  $w_{h_i}$  and the dependency label is  $l_i$ . We design three strategies to extend the parsing tree from word level to subword level. All of them regard  $[\text{CLS}]$  as the ROOT ( $w_{01}$ ), and the header of  $[\text{SEP}]$  as  $[\text{CLS}]$ , and the label as the padding label " $\_$ ".

- Set the head of all the subwords of  $w_i$  as  $w_{h_{i1}}$ , and the label as  $l_i$ .
- Set the head of  $w_{i1}$  as  $w_{h_{i1}}$  and the label as  $l_i$ , and set the head of  $w_{i2}, \dots, w_{is_i}$  as  $w_{i1}$  and label as a special label "APP".
- Set the head of  $w_{i1}$  as  $w_{h_{i1}}$  and the label as  $l_i$ , and set the head of  $w_{ij}$  as  $w_{i(j-1)}$  for  $j = 2, \dots, s_i$  and label as a special label "APP". As shown in Figure 2.

### A.2 Details of Experimental Data and Model Parameters

### A.3 Cross-lingual Results on UD Treebanks

Table 9 shows the zero-shot cross-lingual transfer experiments of our PrLM on the 22 languages of UD Treebanks. The findings from comparison reveal that our UD-BERT and UD-XLM-R have significantly improved the transfer effect of this parser in which the average improvement of UD-BERT and UD-XLM-R is 9.93/8.09, 8.86/8.32 UAS/LAS, respectively. This is due in large part to the usage of UD annotations in the language model pre-training, but it also demonstrates that our PrLM well learned UD parsing and encoded the structural information of the parse into the final representations.

### A.4 Monolingual Results on Low-resource Treebanks in UD

We select all treebanks in UD with training sets under 100 sentences to evaluate the performance of our model in low-resource languages. The results are shown in Table 10, where we compare our method with the baselines and the biaffine model without PrLM (*w/o PrLM*). It can be seen that the results on UD-BERT and UD-XLM-R all outperform their baseline. This shows that our method can partially solve the problem of poor performance of the multilingual PrLM in low-resource languages.

Table 8: Details of the selected languages in UD.

| Language        | Treebank  | Sents   |
|-----------------|-----------|---------|
| Bulgarian (bg)  | BTB       | 8,907   |
| Catalan (ca)    | AnCora    | 13,123  |
| Czech (cs)      | PDT       | 102,993 |
| Dutch (nl)      | Alpino    | 18,058  |
| English (en)    | EWT       | 12,543  |
| Estonian (et)   | EDT       | 20,827  |
| Finnish (fi)    | TDT       | 12,217  |
| French (fr)     | GSD       | 14,554  |
| German (de)     | GSD       | 13,814  |
| Hebrew (he)     | HTB       | 5,241   |
| Hindi (hi)      | HDTB      | 13,304  |
| Indonesian (id) | GSD       | 4,477   |
| Italian (it)    | ISDT      | 13,121  |
| Korean (ko)     | GSD       | 27,410  |
| Latin (la)      | PROIEL    | 15,906  |
| Latvian (lv)    | LVTB      | 5,424   |
| Norwegian (no)  | Bokmaal   | 29870   |
| Polish (pl)     | LFG       | 19,874  |
| Romanian (ro)   | RRT       | 8,043   |
| Russian (ru)    | SynTagRus | 48,814  |
| Slovak (sk)     | SNK       | 8,483   |
| Spanish (es)    | AnCora    | 28,492  |

Table 9: The cross-lingual UAS/LAS results on 22 languages of UD Treebanks.

| <i>Cross-Transfer</i>           | en            | bg            | ca            | cs            | nl            | et            | fi            | fr            |
|---------------------------------|---------------|---------------|---------------|---------------|---------------|---------------|---------------|---------------|
| m-BERT                          | 92.52 / 91.29 | 83.80 / 72.77 | 79.60 / 69.00 | 73.95 / 61.23 | 77.76 / 69.02 | 73.11 / 50.90 | 75.71 / 54.96 | 83.18 / 70.76 |
| <b>UD-BERT</b>                  | 93.01 / 91.43 | 89.64 / 79.02 | 87.18 / 76.06 | 86.07 / 70.38 | 86.79 / 78.74 | 82.38 / 58.53 | 83.86 / 60.97 | 89.07 / 75.86 |
| XLM-R <sub>large</sub>          | 93.10 / 91.32 | 88.67 / 77.91 | 85.00 / 73.71 | 77.80 / 65.12 | 82.10 / 72.79 | 78.66 / 57.67 | 80.97 / 60.63 | 88.27 / 74.71 |
| <b>UD-XLM-R<sub>large</sub></b> | 94.19 / 92.54 | 92.66 / 82.15 | 90.76 / 79.35 | 88.98 / 75.67 | 90.94 / 82.33 | 87.57 / 65.90 | 90.09 / 68.95 | 93.19 / 78.93 |
|                                 | en            | de            | he            | hi            | id            | it            | ko            | la            |
| m-BERT                          | 92.52 / 91.29 | 76.54 / 66.00 | 73.48 / 47.26 | 43.77 / 29.83 | 57.06 / 47.82 | 87.41 / 80.93 | 36.97 / 23.44 | 52.39 / 36.42 |
| <b>UD-BERT</b>                  | 93.01 / 91.43 | 84.54 / 74.88 | 87.33 / 55.98 | 66.99 / 42.82 | 76.18 / 62.37 | 92.74 / 86.59 | 53.89 / 36.94 | 71.66 / 51.91 |
| XLM-R <sub>large</sub>          | 93.10 / 91.32 | 81.65 / 71.34 | 73.86 / 48.66 | 48.08 / 31.66 | 60.57 / 51.32 | 91.02 / 84.31 | 40.64 / 25.50 | 60.95 / 42.44 |
| <b>UD-XLM-R<sub>large</sub></b> | 94.19 / 92.54 | 88.05 / 79.34 | 86.42 / 56.69 | 65.57 / 47.13 | 77.65 / 64.52 | 95.39 / 88.83 | 52.98 / 37.52 | 76.26 / 57.14 |
|                                 | en            | lv            | no            | pl            | ro            | ru            | sk            | es            |
| m-BERT                          | 92.52 / 91.29 | 76.51 / 54.52 | 87.28 / 78.67 | 88.76 / 76.43 | 75.94 / 62.83 | 72.73 / 62.40 | 79.14 / 67.86 | 80.08 / 70.64 |
| <b>UD-BERT</b>                  | 93.01 / 91.43 | 83.07 / 60.94 | 90.41 / 82.22 | 92.97 / 81.26 | 87.50 / 72.59 | 85.80 / 72.58 | 88.69 / 74.83 | 85.93 / 76.15 |
| XLM-R <sub>large</sub>          | 93.10 / 91.32 | 83.94 / 62.52 | 90.50 / 82.56 | 90.68 / 77.90 | 81.75 / 69.01 | 76.64 / 66.58 | 81.63 / 70.60 | 85.00 / 74.36 |
| <b>UD-XLM-R<sub>large</sub></b> | 94.19 / 92.54 | 91.21 / 69.64 | 94.14 / 86.37 | 95.48 / 83.91 | 91.28 / 77.80 | 91.29 / 80.64 | 92.02 / 80.56 | 90.37 / 79.78 |

Table 10: The monolingual UD parsing result (UAS/LAS) on treebanks with training set under 100 sentences: Kurmanji(kmr)-MG, Swedish\_Sign\_Language(sw)-SSLC, Livvi(olo)-KKPP, Kazakh(kk)-KTB, Buryat-BDT(bxr), Upper\_Sorbian(hsb)-UFAL.

| <i>All-FT</i>                   | kmr-mg |       | swl-sslc |       | olo-kkpp |       | kk-ktb |       | bxr-bdt |       | hsb-ufal |       |
|---------------------------------|--------|-------|----------|-------|----------|-------|--------|-------|---------|-------|----------|-------|
|                                 | UAS    | LAS   | UAS      | LAS   | UAS      | LAS   | UAS    | LAS   | UAS     | LAS   | UAS      | LAS   |
| <i>w/o PrLM</i>                 | 18.33  | 8.06  | 19.33    | 10.86 | 41.84    | 30.25 | 66.80  | 58.73 | 39.61   | 17.33 | 68.41    | 53.05 |
| m-BERT                          | 32.26  | 11.09 | 34.61    | 20.15 | 59.93    | 36.44 | 78.26  | 62.80 | 51.56   | 23.06 | 73.16    | 60.92 |
| <b>UD-BERT</b>                  | 38.80  | 17.01 | 39.82    | 23.50 | 64.48    | 41.71 | 81.13  | 65.56 | 55.68   | 26.29 | 75.33    | 62.94 |
| XLM-R <sub>base</sub>           | 74.62  | 59.86 | 50.87    | 36.81 | 70.21    | 51.52 | 80.03  | 65.20 | 55.24   | 25.95 | 80.17    | 69.92 |
| <b>UD-XLM-R<sub>base</sub></b>  | 78.55  | 62.92 | 55.88    | 42.00 | 75.97    | 54.33 | 81.74  | 66.79 | 59.37   | 29.40 | 83.25    | 72.88 |
| XLM-R <sub>large</sub>          | 77.89  | 62.24 | 55.67    | 42.02 | 72.89    | 53.01 | 82.15  | 66.97 | 55.30   | 26.27 | 81.38    | 71.17 |
| <b>UD-XLM-R<sub>large</sub></b> | 81.62  | 64.10 | 58.26    | 43.72 | 76.08    | 56.41 | 85.69  | 70.98 | 60.40   | 30.92 | 85.12    | 74.16 |
